# Supplementary material for: Dietary Administration of Novel Multistrain Probiotics from Healthy Grouper Intestines Promotes the Intestinal Immune Response against NNV Infection
Source: MDPI journal article supplement (doi:10.3390/life11101053), 2021-10-07
Supplement: s1 [file s1]

# Supplementary Materials: Dietary Administration of Novel Multistrain Probiotics from Healthy Grouper Intestines Promotes the Intestinal Immune Response Against NNV Infection

Joan Tang Xiao Joe, Henry Tan Shi Sung, Jen-Leih Wu , Yu-Shen Lai and Ming-Wei Lu

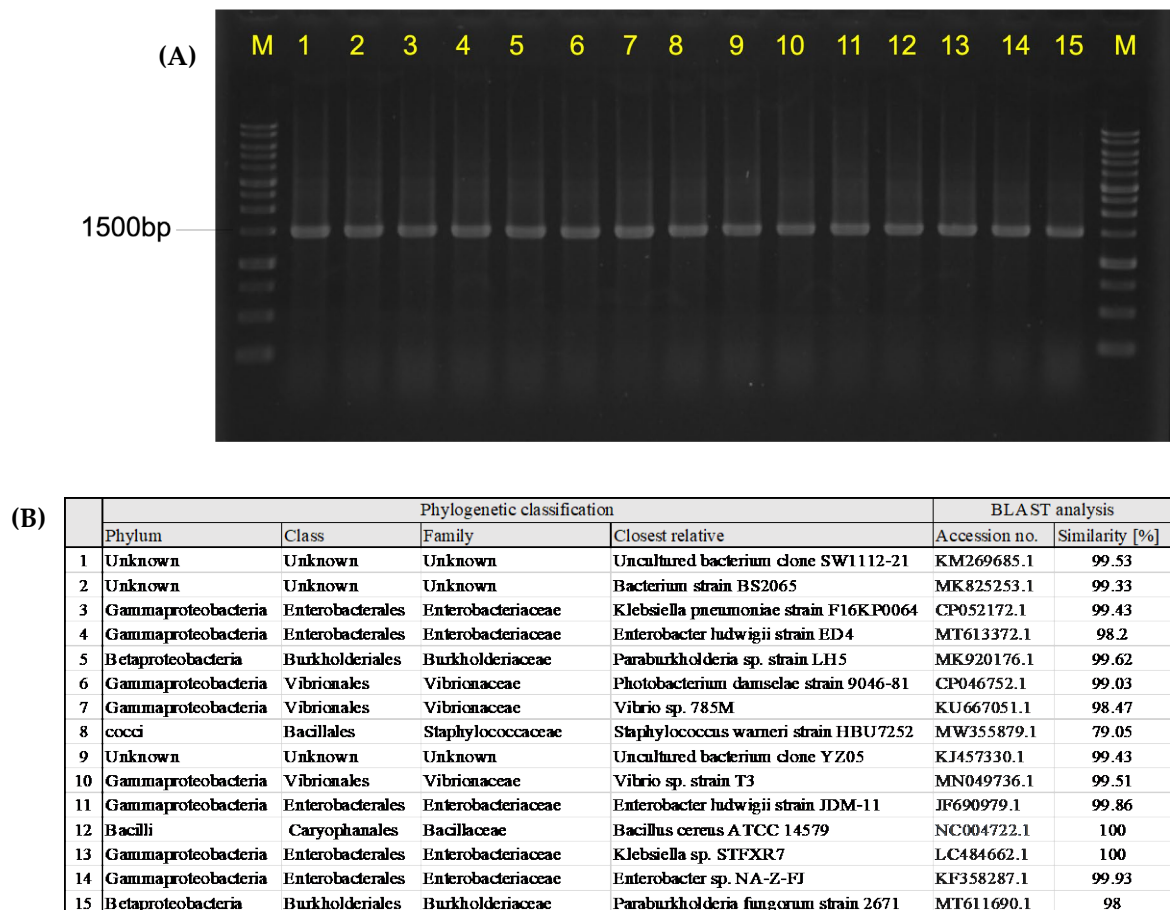

**Supplementary Figure S1.** Identification of isolated bacteria. (A) Agarose gel electrophoresis of bacterial isolates PCR products. Lane M: 1.5 Kb DNA ladder, lanes 1-15: bacterial isolates PCR products (1465 bp). (B) Molecular identification of isolates based on partial 16S rRNA gene sequence information.

(A)

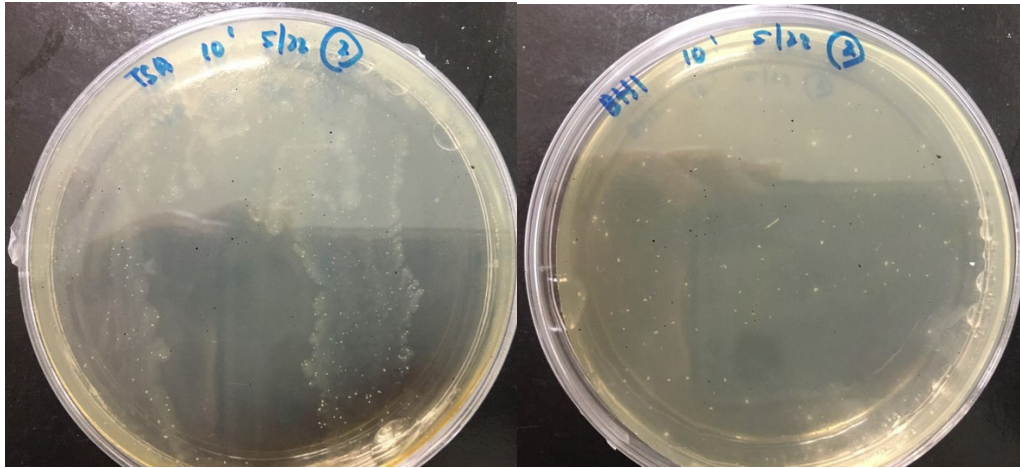

(B)

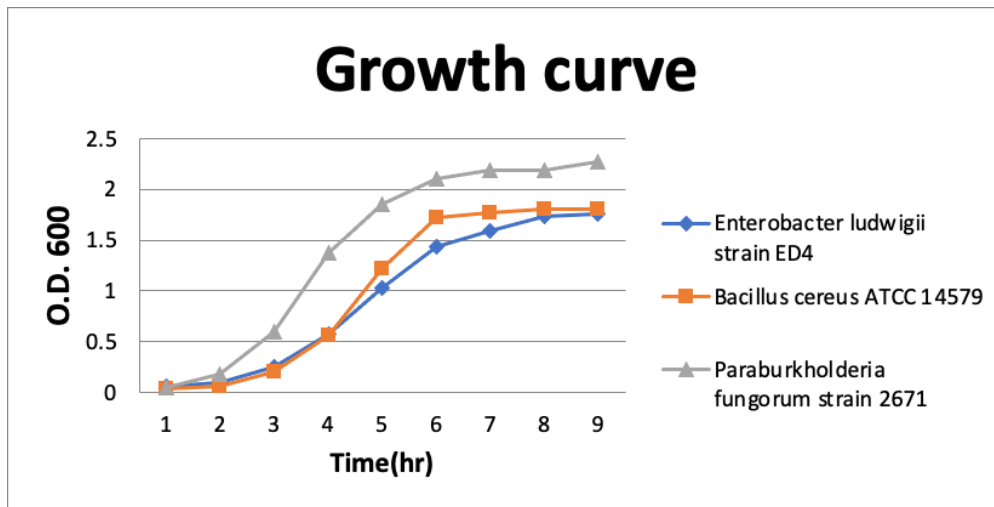

**Supplementary Figure S2.** The procedure of candidate probiotics isolation. (A) The intestine mixture was pour-plated on two non-selective (TSA and BHI) agar and incubated at 28 °C with anaerobic condition (using anaerocult A gas packs; Merck) (B) The Growth curve of *Bacillus cereus* ATCC 14579, *Paraburkholderia fungorum* strain 2671, and *Enterobacter ludwigii* strain ED4. The OD600 values were monitored for each culture with a 1 h interval. Experiments were done in triplicate.
